# Supplementary material for: Comparative Metabolite and Gene Expression Analyses in Combination With Gene Characterization Revealed the Patterns of Flavonoid Accumulation During Cistus creticus subsp. creticus Fruit Development
Source: Frontiers journal article supplement (doi:10.3389/fpls.2021.619634), 2021-03-26
Supplement: Data_Sheet_3.PDF [file Data_Sheet_3.PDF]

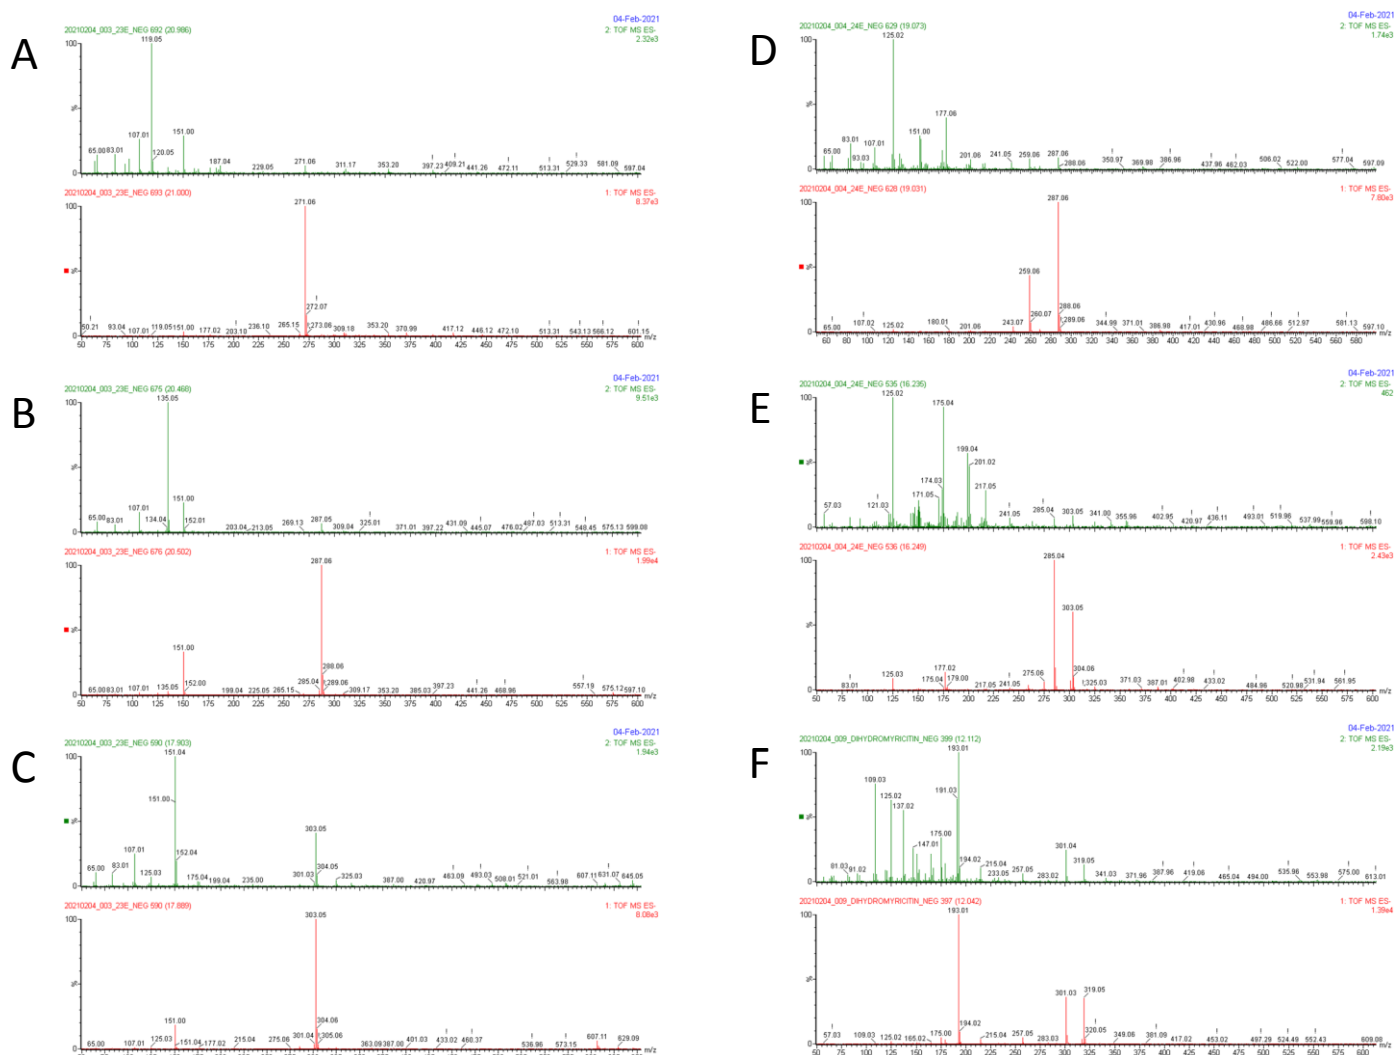

**Supplementary Figure S6.** Fragmentation of the six key compounds of enzymatic studies of Cistus F3'5'H recombinant protein at two different collision and trap collision energies: upper spectra (green lines)- high energy with 6 V for collision and 30 V for trap collision; lower spectra (red lines)- low energy with 4 V for collision and 6 V for trap collision. A - Naringenin; B - Eriodictyol; C - Pentahydroxyflavanone; D- Dihydrokaempferol; E - Dihydroquercetin; F - Dihydromyricetin;
