# Supplementary material for: Comparative Metabolite and Gene Expression Analyses in Combination With Gene Characterization Revealed the Patterns of Flavonoid Accumulation During Cistus creticus subsp. creticus Fruit Development
Source: Frontiers journal article supplement (doi:10.3389/fpls.2021.619634), 2021-03-26
Supplement: Table_3.docx [file Table_3.docx]

**Supplementary Table S3: Protein sequences used in phylogenetic analyses of *F3’H* and *F3’5’H* genes**

| Gene | Accession Nr. | Species |
| --- | --- | --- |
| F3’H | ABW69386 | *Glycine max* |
| F3’H | BAD00187 | *Ipomoea nil* |
| F3’H | AAD56282 | *Petunia x hybrida* |
| F3’H | CAI54278 | *Vitis vinifera* |
| F3’H | BAO58432 | *Vaccinium ashei* |
| F3’H | AOV62762 | *Morus alba* |
| F3’H | ACR14867 | *Malus domestica* |
| F3’H | ATI97619 | *Lotus filicaulis* |
| F3’H | QBI59828 | *Lactuca sativa* |
| F3’H | ACY06905 | *Gossypium hirsutum* |
| F3’H | BAL63027 | *Fragaria x ananassa* |
| F3’H | AUV64093 | *Euphorbia pulcherrima* |
| F3’H | ADA85878 | *Chrysanthemum x morifolium* |
| F3’H | ADZ28515 | *Camellia nitidissima* |
| F3’H | AEX07282 | *Arachis hypogaea* |
| F3’H | EOY22048 | *Theobroma cacao* |
| F3’H | MT829314 | *Cistus creticus (contig c24087)* |
| F3’5’H | APY18930 | *Camellia sinensis* |
| F3’5’H | QGZ19237 | *Capsicum annuum* |
| F3’5’H | BAO66643 | *Delphinium grandiflorum* |
| F3’5’H | BAH89265 | *Diospyros kaki* |
| F3’5’H | AUV64097 | *Euphorbia pulcherrima* |
| F3’5’H | BAK64100 | *Eustoma exaltatum subsp. russellianum* |
| F3’5’H | ABQ96218 | *Glycine max* |
| F3’5’H | ACY06904 | *Gossypium hirsutum* |
| F3’5’H | AGT57963 | *Lycium ruthenicum* |
| F3’5’H | AUI38394 | *Petunia x hybrida* |
| F3’5’H | ADC80513 | *Solanum lycopersicum* |
| F3’5’H | QFR04858 | *Solanum tuberosum* |
| F3’5’H | EOY32873 | *Theobroma cacao* |
| F3’5’H | CAI54277 | *Vitis vinifera* |
| F3’5’H | MT707661 | *Cistus creticus (contig c15585)* |
